# Supplementary material for: The synergistic effects of carbon coating and micropore structure on the microwave absorption properties of Co/CoO nanoparticles
Source: Royal Society of Chemistry journal article supplement (doi:10.1039/c6cp05099a), 2016-01-01
Supplement: c6cp05099a1.pdf [file c6cp05099a1.pdf]

**Electronic Supplementary Information**  
**The Synergistic Effects of the Carbon Coating and Micropore**  
**Structure on the Microwave Absorption Properties of the**  
**Co/CoO Nanoparticles**

XiuBo Xie<sup>a</sup>, Yu Pang<sup>a</sup>, Hiroaki Kikuchi<sup>b</sup>, Tong Liu<sup>a,\*</sup>

<sup>a</sup>Key Laboratory of Aerospace Materials and Performance (Ministry of Education),  
School of Materials Science and Engineering, Beihang University, No.37 Xueyuan  
Road, Beijing, 100191, China

<sup>b</sup>Faculty of Science and Engineering, Iwate University, Ueda, Morioka, 020-8551,  
Japan

\*Corresponding author: Email address: tongliu@buaa.edu.cn; Tel/fax: +86 10  
82316192

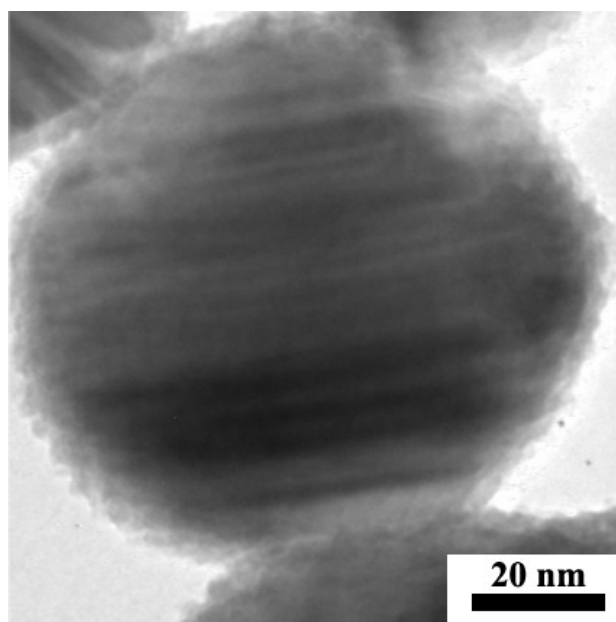

**Fig. S1** The high magnification TEM image of the Co/CoO nanoparticle before carbon coating.
